# Supplementary figures and images for: Verification of a Novel Minimally Invasive Device for the Isolation of Rare Circulating Tumor Cells (CTC) in Cancer Patients’ Blood
Source: MDPI journal article supplement (doi:10.3390/cancers14194753), 2022-09-29

Supplementary figure S1

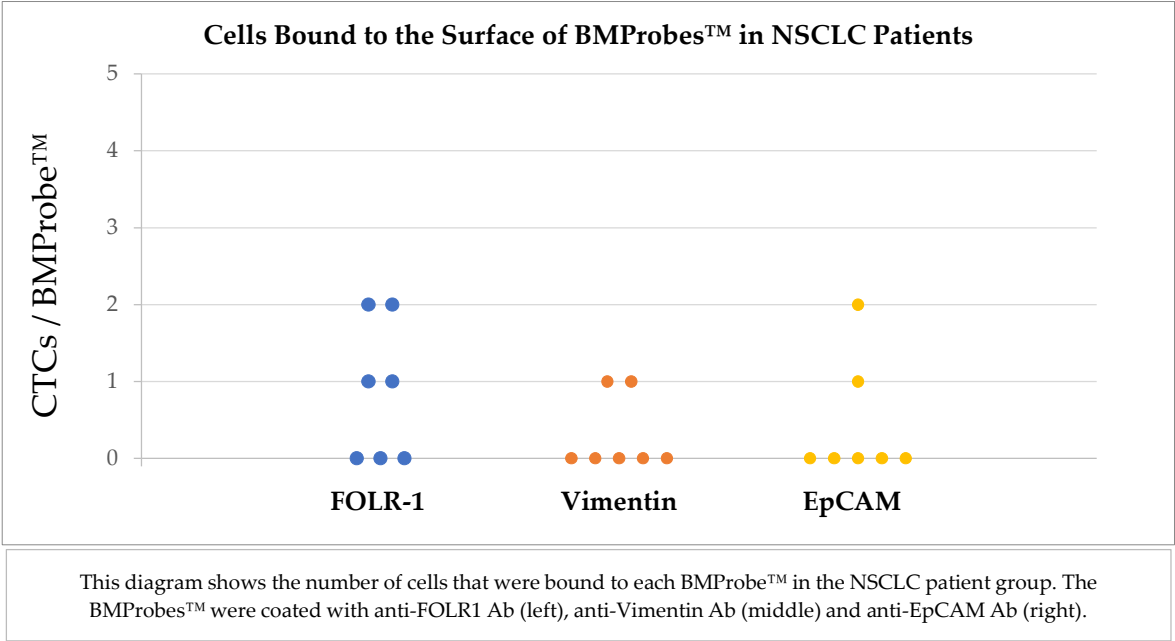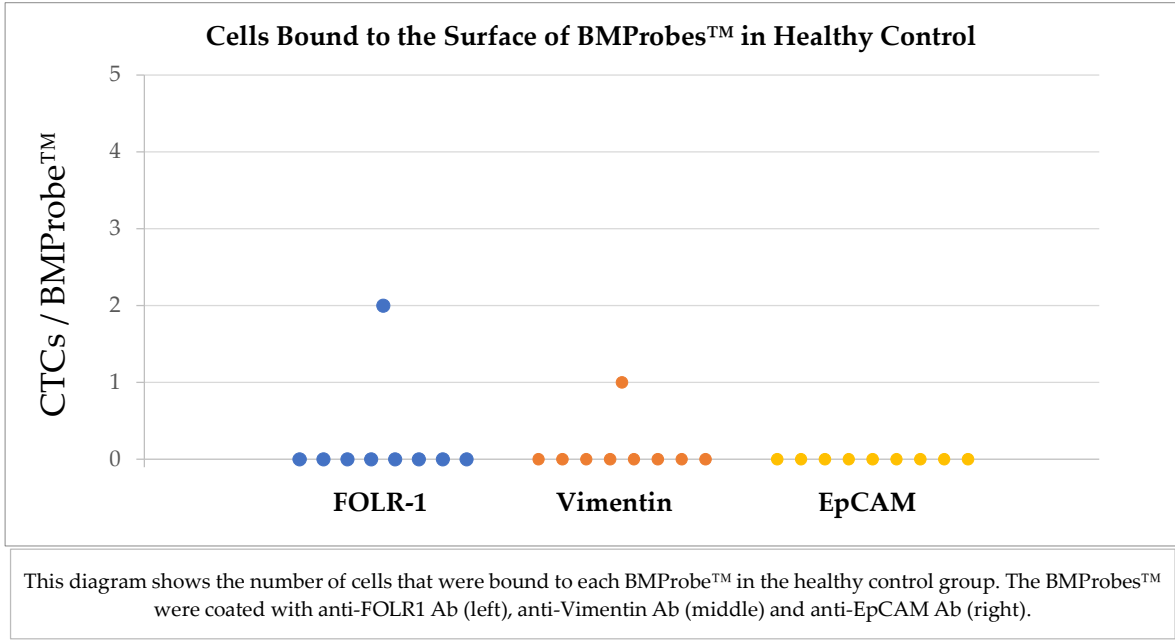

Supplement: s1 [file s1]
